# Supplementary material for: Functional requirement of terminal inverted repeats for efficient ProtoRAG activity reveals the early evolution of V(D)J recombination
Source: PubMed Central journal article supplement (PMC8289069; doi:10.1093/nsr/nwz179), 2019-11-13
Supplement: nwz179_supplemental_file.pdf [file nwz179_supplemental_file.pdf]

|          |                   | heptamer                                          | nonamer                                                |                                                       |
|----------|-------------------|---------------------------------------------------|--------------------------------------------------------|-------------------------------------------------------|
| RAG      | Mm_12RSS          | CACAGTG. ATACAGCCCTTA. .... .ACAAAAACC. .... .    |                                                        |                                                       |
|          | Mm_23RSS          | CACAGTG. ATGCAAACCAAGTGTGAAGGGATACAAAAACC. .... . |                                                        |                                                       |
| ProtoRAG | Bb_ProtoRAG_27ITR | CAC                                               | TATGAAA                                                | ACTTACGTGTGCATAAGGTCGGCG. .... .GCCATCTTG             |
|          | Bl_SC0000026_5    | CAC                                               | TATGAAA                                                | AGTTACGTGTGCACAAGGTTTTCC. .... .GCCATCTTG             |
|          | Bf_V2_112_5       | CAC                                               | TATGAAA                                                | AGTTACGTGTGCATAAGCTATGGGCTTTCGTGCGGTCGGCAGCCGCCATCTTG |
|          | Bf_V2_393_5       | CAC                                               | TATGAAA                                                | AGTTACGTGTGCATAAGCTATGGGCTTACGTGCGGTCGGCAGCCGCCATCTTG |
|          | Bb_ProtoRAG_31TIR | CAC                                               | TATG. ATACTTACGCTATACCCAGCAGTGTCTGGTC. .... .GCCATCTTG |                                                       |
|          | Bl_SC0000026_3    | CAC                                               | TATG. ATACTTACGCTATCCAGCGGTGCCTGGTT. .... .GCCATCTTG   |                                                       |
| RAG-like | Bf_V2_112_3       | CAC                                               | TATG. AA                                               | ACTTACGCCATACCCAGCGGTGCACGGTC. .... .GCCATCTTG        |
|          | Bf_V2_293_3       | CAC                                               | TATG. AA                                               | CTTACGCCATACCCAGCGGTGCACGGTC. .... .GCCATCTTG         |
|          | Pm_TransibSU_5'_1 | CAC                                               | AGCGAAAA                                               | ATCCCATGGTAGTGTAACACGGGA. .... .                      |
|          | Pm_TransibSU_3'_1 | CAC                                               | AGCGAAAA                                               | ATGCCATTACATGAATTG. .ACACGGGA. .... .                 |
|          | Pm_TransibSU_5'_2 | CAC                                               | AGCGAAAA                                               | ATCCCATGGCCGTGTAATACGGGA. .... .                      |
|          | Pm_TransibSU_3'_2 | CAC                                               | AGCGAAAA                                               | ATACCTACATGAATTG. .GCACGGGA. .... .                   |
|          | Pf_BCFJ01036631_5 | CAC                                               | ATCC                                                   | CATTCTCTT. .... .TTAGAAATTTGCTT                       |
|          | Pf_BCFJ01036631_3 | CAC                                               | ATCC                                                   | CATTGTACCTGATTAACCA. .TTAGAAATATGCTT                  |
|          | Pf_BCFJ01102604_5 | CAC                                               | ATCC                                                   | AAATGTCCT. .... .TTAGAAATTTGCTT                       |
|          | Pf_BCFJ01102604_3 | CAC                                               | ATCC                                                   | CATTGTTCCTTCCCATTAACCA. .TTAGAAATTAGCTT               |
| Transib  | HZ_Transib_5'     | CAC                                               | GGTGATCG                                               | AAAAATCGGCTCTAGAAGACATAGGATCTCGATGTCTCAA. .... .      |
|          | HZ_Transib_3'     | CAC                                               | GGTGATCG                                               | AAAAATCGGCTCTAGAAGACATAGGATCTCGATGTCTCAA. .... .      |

**Supplementary Figure 1. Sequences comparison of RSSs and TIRs of several RAG-like transposons.**

The RSS and TIR sequences were obtained from public database, including the 12RSS and 23RSS [1], 5'TIR and 3'TIR of *ProtoRAG* in amphioxus [2-4], 5'- and 3'-TIR of RAG-like transposon in 5'- and 3'-TIR of *TransibSU\_PM* [5], 5'- and 3'-TIR of *HZ\_Transib* [6]. The heptamer and nonamer were marked with red and blue color, respectively. Abbreviation of species name, Bb: *Branchiostoma belcheri*; Bl: *Branchiostoma lanceolatum*; Bf: *Branchiostoma floridae*; Pm: *Patiria miniata*; Pf: *Ptychodera flava*; HZ: *Helicoverpa zea*.

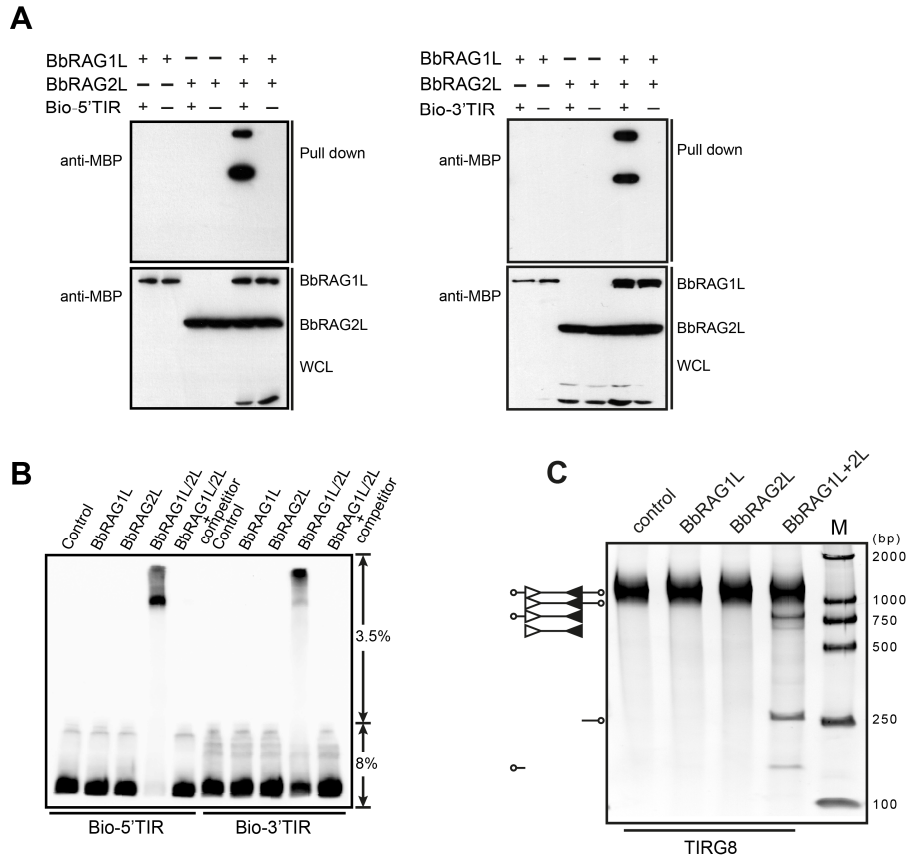

**Supplementary Figure 2. TIRs binding and substrates cleavage depend on the cooperation of BbRAG1L and BbRAG2L.**

**(A)** Pull down assay to detect the binding of BbRAG1L and BbRAG2L with 5'TIR and 3'TIR.

**(B)** EMSA assay to detect the binding of BbRAG1L and BbRAG2L to biotin-5'TIR and biotin-3'TIR.

We used 200-fold unlabeled 5'TIR or 3'TIR as a competitive probe, and binding reactions were separated on a 3.5/8% native TBE page gel.

**(C)** Cleavage of TIRG8 substrate by indicated proteins. The composition of the cleavage product was shown on the left according to the length of corresponding fragments.

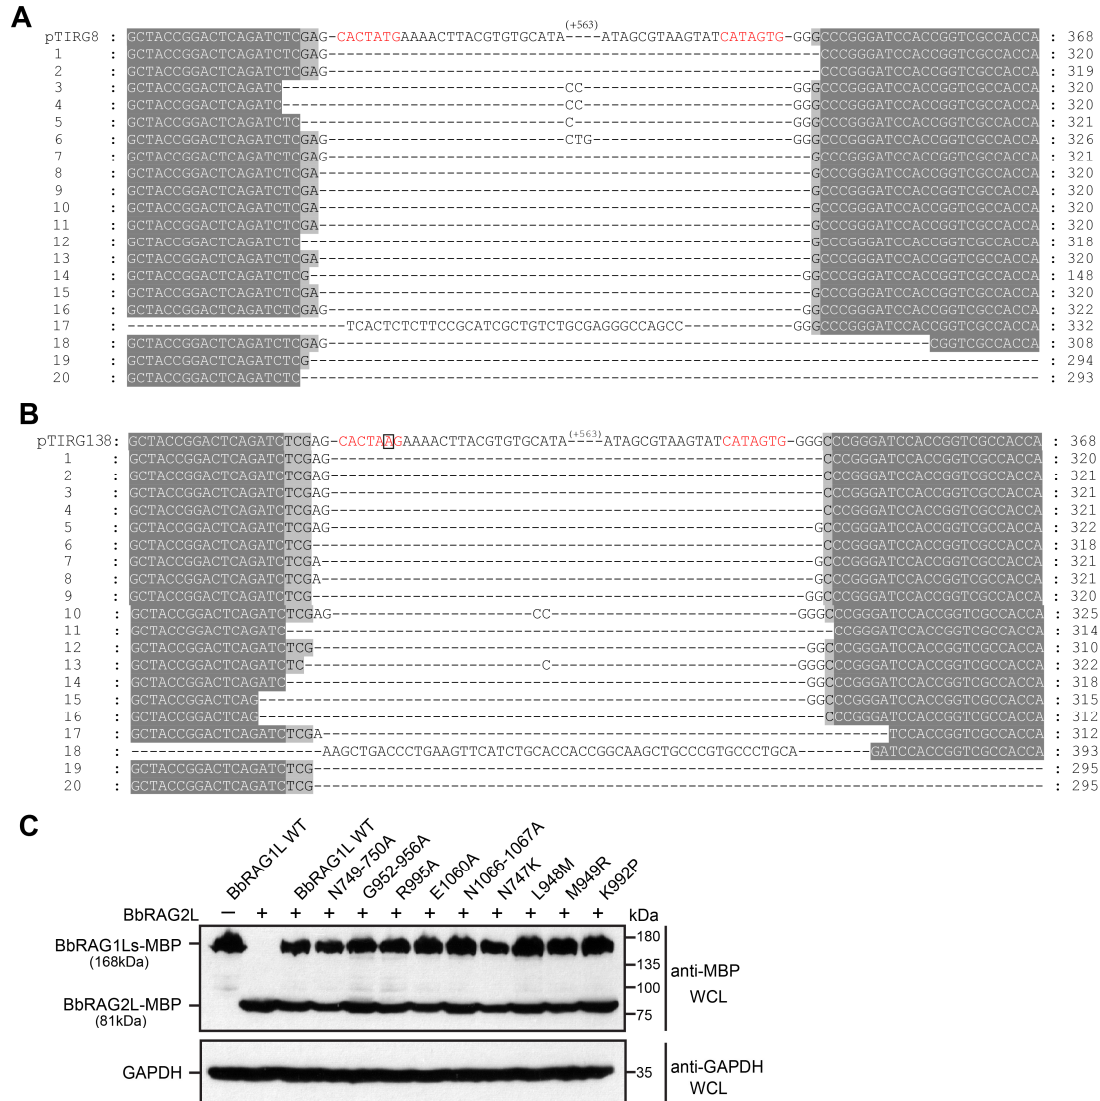

**Supplementary Figure 3. Analysis of HDJ products produced by BbRAG1L/2L mediated recombination and expression of BbRAG1L mutants with BbRAG2L**

(A) Sequence alignment of HDJ products from recombination of pTIRG8 by BbRAG1L/2L.

(B) Sequence alignment of HDJ products from recombination of pTIRG138 by BbRAG1L/2L. The first line shows partial sequence of the un-cleaved pTIRG8 (A) and pTIRG138 (B). The TR1 in 5'/3'TIR were marked with red color, and the mutated nucleotides were marked with unfilled rectangle. The HDJ products from 20 clones of *E. coli* were sequenced, and their sequences were aligned with that of un-cleaved substrates.

(C) Co-expression of BbRAG1L mutants with BbRAG2L in HEK293T cells. Name of the BbRAG1L mutants shown their mutated amino acids, such as, N749-750A: amino acids in position 749 and 750 were both mutated into A. All BbRAG proteins were fused with MBP tag at their N-terminus. Whole cell lysis (WCL) was used for western blot to detect the expression of BbRAG1L mutants and BbRAG2L, and the total proteins were quantified with GAPDH.

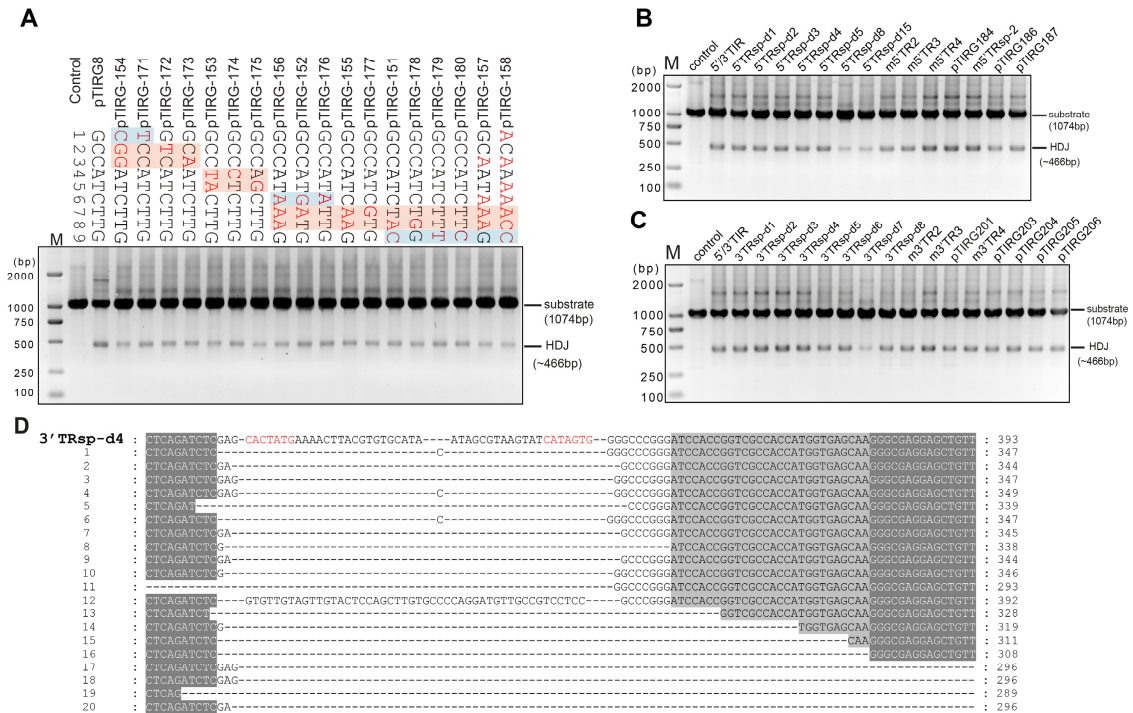

**Supplementary Figure 4. PCR assay to detect recombined HDJ products produced during BbRAG1L/2L-mediated recombination with the corresponding substrates.**

- (A) Detection of recombined HDJ products produced during BbRAG1L/2L-mediated recombination with the TR5-mutated TIR substrates.
- (B) Detection of recombined HDJ products produced during BbRAG1L/2L-mediated recombination with the 5' TRsp-deletion and 5' TRsp-mutation substrates.
- (C) Detection of recombined HDJ products produced during BbRAG1L/2L-mediated recombination with the 3' TRsp-deletion and 3' TRsp-mutation substrates.
- (D) Alignment of the HDJ sequences produced in recombination of 3' TRsp-d4 substrate. First line is the original sequence of 3' TRsp-d4, with the TR1 colored with red. HDJ sequences from 20 clones were analyzed. Cleavage on the plasmid backbone caused long nucleotides deletion to be marked with dash.

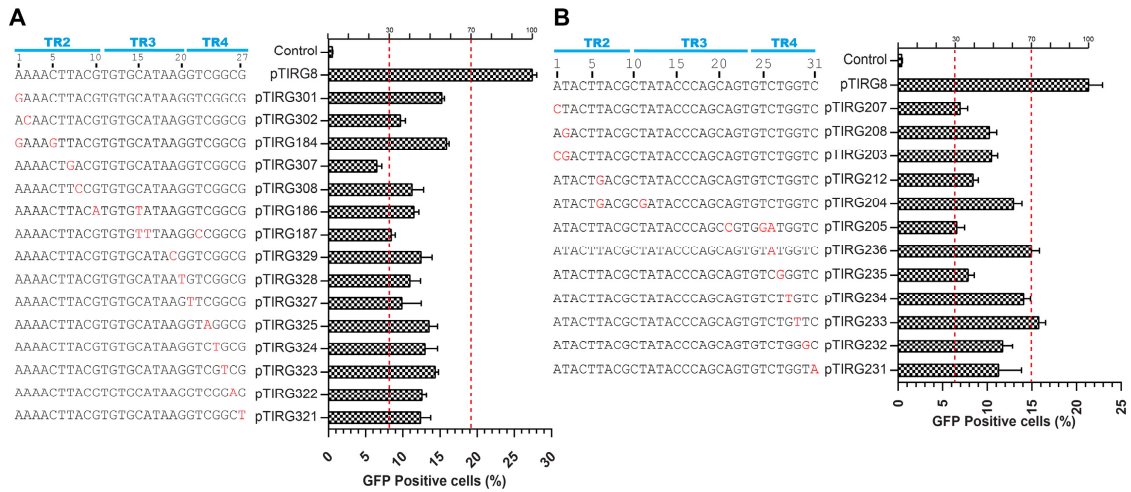

**Supplementary Figure 5. Quantification of GFP positive cells produced by BbRAG1L/2L mediated recombination with the 5'TRsp-mutation TIR substrates (A) and 3'TRsp-mutation TIR substrates (B).**

Position and definition of regions are consistent with Fig 4. The substitution of nucleotides was shown as indicated (marked with red color). Y axis refers to the TIR substrates. Bottom X axis showed the percentage of GFP positive cells, and upper X axis showed the percentage of GFP positive cells relative to the value of pTIRG8. Three levels of effect (slightly, moderately, dramatically) were defined according to the value on the right Y axis (>70%, 30%-70%, <30%). Results are expressed as means (+/-SEM).

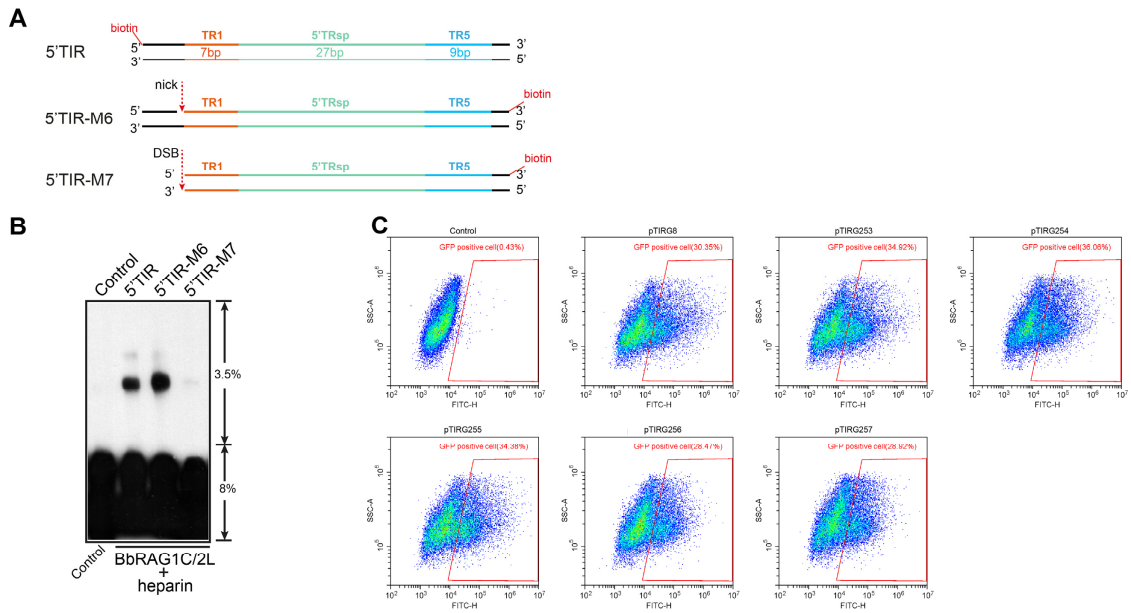

**Supplementary Figure 6. Flanking sequences are important for the activity of BbRAG1L/2L.**

- (A) Diagram of modified 5'TIRs to contain a nick or broken flanking sequence aside of the heptamer.
- (B) EMSA assay to detect the binding of BbRAG1C/2L with nicked 5'TIR and broken 5'TIR.
- (C) Quantification of GFP-positive cells produced by BbRAG1L/2L-mediated recombination with TSD sequences containing TIR substrates. One of the representative results from three independent experiments were shown. The TSD sequence of these substrates were shown in Fig 5C.

**Supplementary Table 1. Oligonucleotides used in PCR and EMSA assays**

| Name           | Sequence                                                                         |
|----------------|----------------------------------------------------------------------------------|
| BIO-3'TIR-F    | Biotin-5'GGTGGATCCCGGGCCCCACTATGATACTTACGCTATACCCAGCAGTGTCTGGTCGCCATCTTGTAAGAT3' |
| 3'TIR-R        | 5'ATCTTACAAGATGGCGACCAGACACTGCTGGGTATAGCGTAAGTATCATAGTGGGGCCCGGATCCACC3'         |
| BIO-5'TIR-F    | Biotin-5'CGGACTCAGATCTCGAGCACTATGAAAACCTACGTGTGCATAAGGTCGGCGGCCATCTTGTAATG3'     |
| 5'TIR-R        | 5'CATTACCAAGATGGCCGCCGACCTTATGCACACGTAAGTTTTTCATAGTGTCTCGAGATCTGAGTCCG3'         |
| 5'TIR-MF6      | 5'CGGACTCAGATCTCGAG3'                                                            |
| BIO-5'TIR-MF7  | 5'CACTATGAAAACCTACGTGTGCATAAGGTCGGCGGCCATCTTGTAATG3'-Biotin                      |
| 5'TIR-MR7      | 5'CATTACCAAGATGGCCGCCGACCTTATGCACACGTAAGTTTTTCATAGTG3'                           |
| Bio-NSP-F      | Biotin-5'CGGACTCAGATCTCGAGTCCAGAAGTCGCTCGACTGTGGTTAATCGCTTGTAGCGTGGTCTGGTAATG3'  |
| NSP-R          | 5'CATTACCAGACCAGCTACAAGCGATTAACCACAGTCGAGCGACTTCTGGACTCGAGATCTGAGTCCG3'          |
| BIO-5'TIR-ΔN-F | Biotin-5'CGGACTCAGATCTCGAGCACTATGAAAACCTACGTGTGCATAAGGTCGGCGGTAATG3'             |
| 5'TIR-ΔN-R     | 5'CATTACCGCCGACCTTATGCACACGTAAGTTTTTCATAGTGTCTCGAGATCTGAGTCCG3'                  |
| Bio-12RSS-F    | Biotin-5'GATCTGGCCTGTCTTACACAGTGATACAGACCTTAACAAAAACCCTGCAG 3'                   |
| 12RSS-R        | 5'CTGCAGGGTTTTTGTAAAGGTCTGTACTGTGTAAGACAGGCCAGATC 3'                             |
| Bio-12RSS-ΔN-F | Biotin-5'GATCTGGCCTGTCTTACACAGTGATACAGACCTTACTCTGGCTGCAG 3'                      |
| 12RSS-ΔN-R     | 5'CTGCAGCAGCCAGAGTAAGGTCTGTACTGTGTAAGACAGGCCAGATC 3'                             |
| Bio-RNSP-F     | Biotin-5'GATCTGGCCTGTCTTAGGTCAATGCTGTAGAAGTCTGCTGTACCTGCAG 3'                    |
| RNSP-R         | 5'CTGCAGGTACAGGACGAGTTCTACAGCATTGACCTAAGACAGGCCAGATC 3'                          |
| TIRG_SUB_U1    | 5'TTTGGCACCAAAATCAACGG3'                                                         |
| TIRG_SUB_L1    | 5'GGACTTGAAGAAGTCGTGCT3'                                                         |
| pTIR-P1        | 5'ACTTGGCAGTACATCTAC3'                                                           |
| pTIR-P2        | 5'GATGAACTTCAGGGTCAG3'                                                           |

## References

1. Swanson PC. The bounty of RAGs: recombination signal complexes and reaction outcomes. *Immunol Rev.* 2004; **200**: 90-114.
2. Huang S, Tao X, Yuan S *et al.* Discovery of an Active RAG Transposon Illuminates the Origins of V(D)J Recombination. *Cell.* 2016; **166**: 102-14.
3. Marletaz F, Firbas PN, Maeso I *et al.* Amphioxus functional genomics and the origins of vertebrate gene regulation. *Nature.* 2018; **564**: 64-70.
4. Putnam NH, Butts T, Ferrier DE *et al.* The amphioxus genome and the evolution of the chordate karyotype. *Nature.* 2008; **453**: 1064-71.
5. Kapitonov VV, Koonin EV. Evolution of the RAG1-RAG2 locus: both proteins came from the same transposon. *Biol Direct.* 2015; **10**: 20.
6. Hencken CG, Li X, Craig NL. Functional characterization of an active Rag-like transposase. *Nat Struct Mol Biol.* 2012; **19**: 834-6.
